# Supplementary material for: Serum Neutralization Profiles of Straw-Colored Fruit Bats (Eidolon helvum) in Makurdi (Nigeria), against Four Lineages of Lagos Bat Lyssavirus
Source: MDPI journal article supplement (doi:10.3390/v13122378), 2021-11-27
Supplement: s1 [file s1]

## Supplementary Materials

**Table S1.** Reciprocal titers of serum samples against each lineage of LBVs.

| S/N | Sex | LBV A | LBV B | LBV C | LBV D |
|-----|-----|-------|-------|-------|-------|
| 1   | F   | 0.0   | 0.0   | 0.0   | 0.0   |
| 2   | F   | 0.0   | 0.0   | 0.0   | 0.0   |
| 3   | F   | 243.0 | 46.8  | 140.3 | 243.0 |
| 4   | M   | 27.0  | 0.0   | 0.0   | 0.0   |
| 5   | F   | 46.8  | 46.8  | 15.6  | 46.8  |
| 6   | M   | 27.0  | 9.0   | 9.0   | 27.0  |
| 7   | F   | 46.8  | 47.8  | 47.8  | 15.6  |
| 8   | M   | 420.9 | 420.9 | 420.9 | 0.0   |
| 9   | M   | 0.0   | 0.0   | 0.0   | 0.0   |
| 10  | M   | 9.0   | 0.0   | 0.0   | 0.0   |
| 11  | M   | 0.0   | 0.0   | 9.0   | 9.0   |
| 12  | F   | 0.0   | 0.0   | 0.0   | 9.0   |
| 13  | M   | 27.0  | 15.6  | 9.0   | 15.6  |
| 14  | M   | 46.8  | 0.0   | 9.0   | 27.0  |
| 15  | F   | 15.6  | 0.0   | 0.0   | 0.0   |
| 16  | F   | 0.0   | 0.0   | 0.0   | 0.0   |
| 17  | M   | 243.0 | 15.6  | 27.0  | 46.8  |
| 18  | F   | 140.3 | 0.0   | 0.0   | 15.6  |
| 19  | M   | 0.0   | 0.0   | 0.0   | 0.0   |
| 20  | M   | 0.0   | 0.0   | 0.0   | 0.0   |
| 21  | M   | 9.0   | 0.0   | 0.0   | 0.0   |
| 22  | F   | 27.0  | 0.0   | 15.6  | 46.8  |
| 23  | F   | 27.0  | 9.0   | 15.6  | 81.0  |
| 24  | M   | 420.0 | 9.0   | 9.0   | 81.0  |
| 25  | M   | 0.0   | 0.0   | 0.0   | 0.0   |
| 26  | F   | 15.6  | 0.0   | 0.0   | 0.0   |
| 27  | F   | 0.0   | 0.0   | 0.0   | 0.0   |
| 28  | F   | 15.6  | 0.0   | 9.0   | 0.0   |
| 29  | F   | 46.8  | 46.8  | 46.8  | 46.8  |
| 30  | F   | 27.0  | 27.0  | 15.6  | 140.3 |
| 31  | F   | 81.0  | 81.0  | 46.8  | 81.0  |
| 32  | M   | 81.0  | 46.8  | 46.8  | 46.8  |
| 33  | F   | 46.8  | 27.0  | 15.6  | 46.8  |
| 34  | F   | 140.3 | 15.6  | 27.0  | 46.8  |
| 35  | F   | 140.3 | 46.8  | 27.0  | 140.3 |
| 36  | M   | 81.0  | 46.8  | 46.8  | 46.8  |
| 37  | F   | 140.3 | 46.8  | 81.0  | 140.3 |
| 38  | M   | 15.6  | 0.0   | 0.0   | 15.6  |
| 39  | M   | 140.3 | 15.6  | 81.0  | 140.3 |
| 40  | M   | 15.6  | 0.0   | 0.0   | 15.6  |
| 41  | F   | 0.0   | 0.0   | 0.0   | 0.0   |
| 42  | M   | 243.0 | 9.0   | 27.0  | 81.0  |
| 43  | F   | 0.0   | 0.0   | 0.0   | 0.0   |
| 44  | F   | 27.0  | 0.0   | 0.0   | 15.6  |
| 45  | F   | 46.8  | 9.0   | 0.0   | 27.0  |
| 46  | M   | 9.0   | 0.0   | 0.0   | 46.8  |
| 47  | F   | 0.0   | 0.0   | 0.0   | 15.6  |

|    |   |         |       |       |       |
|----|---|---------|-------|-------|-------|
| 48 | M | 0.0     | 15.6  | 0.0   | 15.6  |
| 49 | F | 0.0     | 0.0   | 0.0   | 0.0   |
| 50 | M | 420.0   | 15.6  | 46.8  | 27.0  |
| 51 | M | 9.0     | 0.0   | 9.0   | 27.0  |
| 52 | F | 9.0     | 9.0   | 0.0   | 0.0   |
| 53 | M | 243.0   | 81.0  | 81.0  | 140.3 |
| 54 | M | 243.0   | 27.0  | 27.0  | 46.8  |
| 55 | M | 0.0     | 15.6  | 9.0   | 243.0 |
| 56 | M | 0.0     | 27.0  | 9.0   | 15.6  |
| 57 | F | 27.0    | 15.6  | 9.0   | 27.0  |
| 58 | M | 420.9   | 15.6  | 27.0  | 81.0  |
| 59 | F | 0.0     | 27.0  | 46.8  | 46.8  |
| 60 | M | 0.0     | 27.0  | 27.0  | 46.8  |
| 1  | M | 11364.0 | 0.0   | 27.0  | 46.8  |
| 2  | M | 140.3   | 0.0   | 15.6  | 0.0   |
| 3  | F | 0.0     | 0.0   | 0.0   | 0.0   |
| 4  | F | 9.0     | 0.0   | 0.0   | 0.0   |
| 5  | F | 0.0     | 0.0   | 0.0   | 0.0   |
| 6  | F | 140.3   | 140.3 | 46.8  | 46.8  |
| 7  | F | 0.0     | 0.0   | 0.0   | 0.0   |
| 8  | M | 81.0    | 0.0   | 420.9 | 243.0 |
| 9  | M | 0.0     | 0.0   | 0.0   | 0.0   |
| 10 | F | 15.6    | 0.0   | 15.6  | 0.0   |
| 11 | F | 0.0     | 0.0   | 9.0   | 0.0   |
| 12 | F | 46.8    | 0.0   | 0.0   | 0.0   |
| 13 | F | 46.8    | 0.0   | 420.9 | 0.0   |
| 14 | F | 0.0     | 0.0   | 81.0  | 27.0  |
| 15 | F | 0.0     | 0.0   | 0.0   | 0.0   |
| 16 | M | 0.0     | 0.0   | 9.0   | 0.0   |
| 17 | M | 0.0     | 0.0   | 0.0   | 0.0   |
| 18 | F | 0.0     | 0.0   | 9.0   | 140.3 |
| 19 | F | 0.0     | 0.0   | 0.0   | 0.0   |
| 20 | F | 0.0     | 0.0   | 0.0   | 0.0   |
| 21 | F | 15.6    | 0.0   | 0.0   | 15.6  |
| 22 | M | 15.6    | 0.0   | 0.0   | 15.6  |
| 23 | F | 15.6    | 0.0   | 46.8  | 0.0   |
| 24 | F | 9.0     | 0.0   | 0.0   | 0.0   |
| 25 | F | 15.6    | 0.0   | 81.0  | 0.0   |
| 26 | F | 9.0     | 0.0   | 0.0   | 0.0   |
| 27 | F | 27.0    | 0.0   | 0.0   | 15.6  |
| 28 | M | 15.6    | 0.0   | 0.0   | 0.0   |
| 29 | F | 34092.0 | 9.0   | 27.0  | 15.6  |
| 30 | M | 15.6    | 0.0   | 15.6  | 0.0   |
| 31 | M | 0.0     | 0.0   | 0.0   | 0.0   |
| 32 | F | 140.3   | 0.0   | 0.0   | 0.0   |
| 33 | M | 0.0     | 46.8  | 46.8  | 46.8  |
| 34 | F | 9.0     | 0.0   | 0.0   | 0.0   |
| 35 | F | 140.3   | 0.0   | 0.0   | 15.6  |
| 36 | M | 0.0     | 0.0   | 0.0   | 0.0   |
| 37 | M | 0.0     | 0.0   | 9.0   | 15.6  |
| 38 | F | 81.0    | 0.0   | 0.0   | 27.0  |

|    |   |       |      |       |       |
|----|---|-------|------|-------|-------|
| 39 | F | 46.8  | 15.6 | 0.0   | 0.0   |
| 40 | M | 0.0   | 0.0  | 0.0   | 0.0   |
| 41 | F | 243.0 | 27.0 | 46.8  | 81.0  |
| 42 | M | 140.3 | 0.0  | 0.0   | 46.8  |
| 43 | F | 140.3 | 0.0  | 0.0   | 243.0 |
| 44 | M | 0.0   | 0.0  | 0.0   | 0.0   |
| 45 | F | 15.6  | 0.0  | 9.0   | 15.6  |
| 46 | M | 81.0  | 0.0  | 0.0   | 140.3 |
| 47 | M | 0.0   | 0.0  | 0.0   | 0.0   |
| 48 | F | 0.0   | 0.0  | 0.0   | 0.0   |
| 49 | M | 0.0   | 0.0  | 0.0   | 0.0   |
| 50 | F | 9.0   | 0.0  | 0.0   | 0.0   |
| 51 | F | 0.0   | 0.0  | 0.0   | 0.0   |
| 52 | M | 15.6  | 0.0  | 9.0   | 0.0   |
| 53 | M | 9.0   | 0.0  | 0.0   | 0.0   |
| 54 | F | 15.6  | 0.0  | 46.8  | 81.0  |
| 55 | M | 0.0   | 0.0  | 0.0   | 0.0   |
| 56 | F | 27.0  | 0.0  | 46.8  | 27.0  |
| 57 | F | 81.0  | 0.0  | 27.0  | 27.0  |
| 58 | M | 15.6  | 0.0  | 0.0   | 0.0   |
| 59 | F | 46.8  | 0.0  | 0.0   | 46.8  |
| 60 | M | 140.3 | 0.0  | 81.0  | 46.8  |
| 61 | M | 9.0   | 0.0  | 9.0   | 0.0   |
| 62 | F | 27.0  | 0.0  | 15.6  | 9.0   |
| 63 | F | 243.0 | 0.0  | 420.9 | 420.9 |
| 64 | M | 27.0  | 0.0  | 0.0   | 0.0   |
| 65 | F | 81.0  | 0.0  | 420.9 | 46.8  |
| 66 | M | 0.0   | 0.0  | 0.0   | 0.0   |
| 67 | M | 0.0   | 0.0  | 0.0   | 0.0   |
| 68 | F | 81.0  | 0.0  | 9.0   | 15.6  |
| 69 | M | 27.0  | 0.0  | 0.0   | 0.0   |
| 70 | M | 0.0   | 0.0  | 0.0   | 0.0   |
| 71 | M | 27.0  | 0.0  | 27.0  | 46.8  |
| 72 | F | 46.8  | 46.8 | 27.0  | 81.0  |
| 73 | F | 729.0 | 81.0 | 81.0  | 140.3 |
| 74 | M | 15.6  | 0.0  | 9.0   | 0.0   |
| 75 | M | 0.0   | 0.0  | 0.0   | 0.0   |
| 76 | F | 0.0   | 0.0  | 0.0   | 0.0   |
| 77 | M | 81.0  | 0.0  | 15.6  | 81.0  |
| 78 | M | 0.0   | 0.0  | 0.0   | 9.0   |
| 79 | M | 0.0   | 0.0  | 0.0   | 0.0   |
| 80 | F | 15.6  | 0.0  | 0.0   | 0.0   |
| 81 | F | 9.0   | 0.0  | 0.0   | 0.0   |
| 82 | F | 27.0  | 9.0  | 15.6  | 15.6  |
| 83 | F | 140.3 | 0.0  | 15.6  | 81.0  |
| 84 | F | 0.0   | 0.0  | 0.0   | 0.0   |
| 85 | F | 0.0   | 0.0  | 0.0   | 0.0   |
| 86 | M | 0.0   | 0.0  | 0.0   | 0.0   |
| 87 | M | 46.8  | 0.0  | 15.6  | 15.6  |
| 88 | M | 0.0   | 0.0  | 0.0   | 15.6  |
| 89 | F | 140.3 | 0.0  | 0.0   | 0.0   |

|     |   |       |      |      |       |
|-----|---|-------|------|------|-------|
| 90  | F | 27.0  | 0.0  | 0.0  | 15.6  |
| 91  | M | 81.0  | 15.6 | 0.0  | 0.0   |
| 92  | F | 0.0   | 0.0  | 0.0  | 0.0   |
| 93  | F | 0.0   | 0.0  | 0.0  | 0.0   |
| 94  | M | 9.0   | 0.0  | 15.6 | 15.6  |
| 95  | M | 9.0   | 0.0  | 27.0 | 0.0   |
| 96  | M | 0.0   | 0.0  | 0.0  | 0.0   |
| 97  | F | 0.0   | 0.0  | 0.0  | 0.0   |
| 98  | F | 0.0   | 0.0  | 0.0  | 27.0  |
| 99  | M | 729.0 | 0.0  | 81.0 | 0.0   |
| 100 | F | 0.0   | 0.0  | 0.0  | 9.0   |
| 101 | F | 0.0   | 0.0  | 0.0  | 0.0   |
| 102 | M | 0.0   | 0.0  | 0.0  | 0.0   |
| 103 | F | 81.0  | 0.0  | 15.6 | 46.8  |
| 104 | F | 15.6  | 0.0  | 0.0  | 0.0   |
| 105 | F | 0.0   | 0.0  | 0.0  | 46.8  |
| 106 | F | 27.0  | 0.0  | 15.6 | 0.0   |
| 107 | M | 0.0   | 0.0  | 0.0  | 0.0   |
| 108 | M | 27.0  | 0.0  | 0.0  | 0.0   |
| 109 | M | 140.3 | 9.0  | 0.0  | 0.0   |
| 110 | F | 46.8  | 0.0  | 9.0  | 0.0   |
| 111 | M | 0.0   | 0.0  | 0.0  | 0.0   |
| 112 | F | 15.6  | 0.0  | 15.6 | 15.6  |
| 113 | F | 140.3 | 0.0  | 15.6 | 27.0  |
| 114 | M | 9.0   | 0.0  | 0.0  | 0.0   |
| 115 | M | 0.0   | 0.0  | 0.0  | 0.0   |
| 116 | M | 0.0   | 0.0  | 0.0  | 0.0   |
| 117 | F | 27.0  | 15.6 | 15.6 | 9.0   |
| 118 | F | 0.0   | 0.0  | 0.0  | 27.0  |
| 119 | F | 81.0  | 0.0  | 46.8 | 140.3 |
| 120 | F | 420.9 | 0.0  | 46.8 | 420.9 |

The first 60 samples were collected in year 1 and the rest (n=120) in year 2. Full range titrations (1:53,1441) were carried out on four samples against LBV-A.

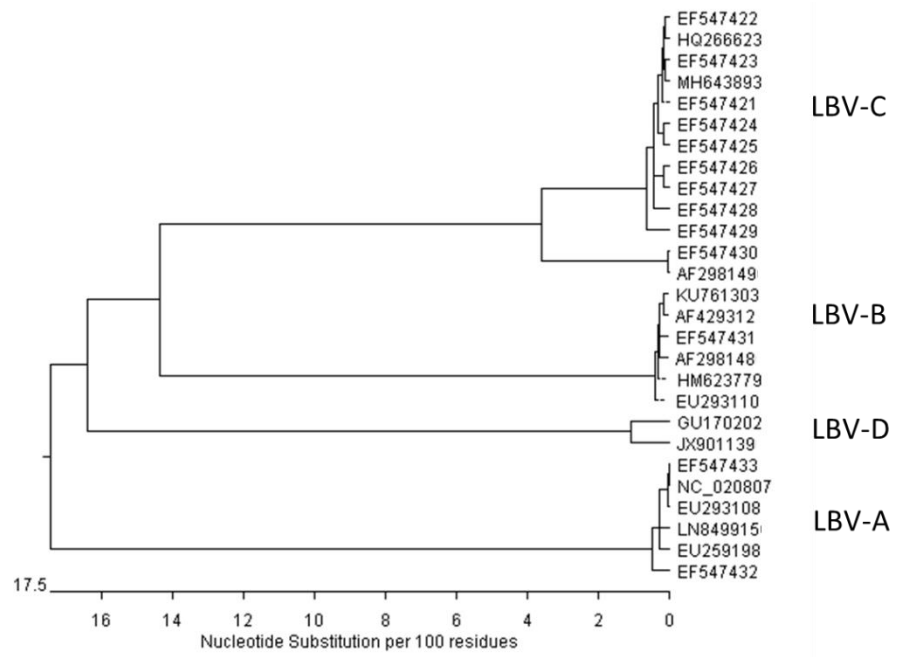

**Figure S1.** The alignment of nucleotide sequences of the glycoprotein genes (G) of four LBV lineages using Clustal W in MagAlign Version 15 of DNASTAR Lasergene 15.

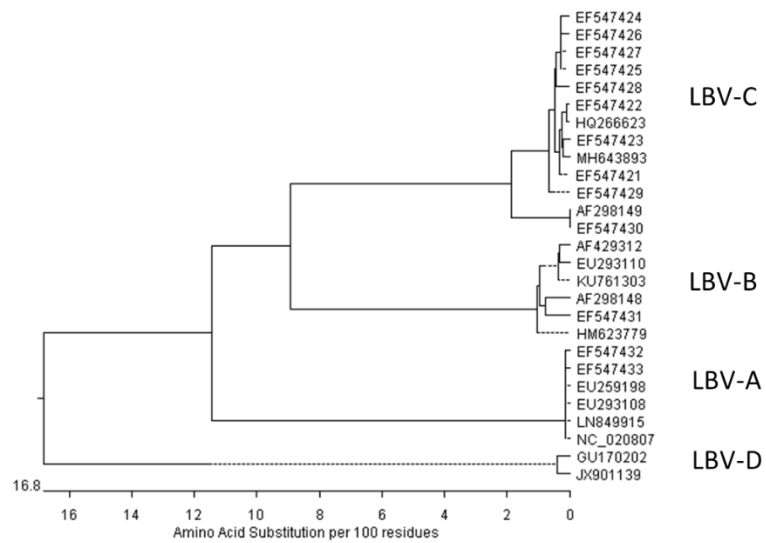

**Figure S2.** The alignment of amino acid sequences of the glycoproteins of four LBV lineages using Clustal W in MagAlign version 15 of DNASTAR Lasergene 15.
